# Supplementary material
Source: Springer Nature journal article supplement (https://www.springermedizin.de/resource/supplementary/12935_2012_360_MOESM2_ESM.pdf/9540390)
Supplement: MOESM2 [file 9540390]

Analysis Name: API-1 - 2012-08-13 08:25

Analysis Creation Date: 2012-08-13

Build version: 162830

Content version: 12710793 (Release Date: 2012-05-07)

## Analysis settings

### [View](#)

Reference set: Ingenuity Knowledge Base (Genes Only)

Relationship to include: Direct and Indirect

Includes Endogenous Chemicals

Optional Analyses: My Pathways My List

### Filter Summary:

Consider only molecules and/or relationships where

(species = Human OR Uncategorized (e.g. chemicals)) AND

(confidence = Experimentally Observed) AND

(tissues/cell lines = Retina OR THP-1 OR Skeletal Muscle OR Immature monocyte-derived dendritic cells OR Large Intestine OR Vd2 Gamma-delta T cells OR Jurkat OR MOLT-4 OR Monocyte-derived macrophage OR Naive B cells OR Pancreas OR Murine NKT cells OR Naive helper T cells OR Vd1 Gamma-delta T cells OR Central memory helper T cells OR CD56bright NK cells OR Activated CD56bright NK cells OR Prostate Gland OR Heart OR SR OR Activated helper T cells OR RAW 264.7 OR Placenta OR Ovary OR Kidney OR Spleen OR HL-60 OR Activated Vd1 Gamma-delta T cells OR Adipose OR Natural T-regulatory cells OR Effector memory cytotoxic T cells OR Thymus OR Activated CD56dim NK cells OR Lung OR Liver OR Small Intestine OR Uterus OR Th2 cells OR Effector memory helper T cells OR Other Tissues and Primary Cells OR Activated Vd2 Gamma-delta T cells OR CD56dim NK cells OR Macrophages OR Monocytes OR Central memory cytotoxic T cells OR Mature monocyte-derived dendritic cells OR Memory B cells OR Bladder OR Stomach OR CCRF-CEM OR K-562 OR BDCA-1+ dendritic cells OR

Cytotoxic T cells OR Effector memory RA+ cytotoxic T cells OR Neutrophils OR Effector T cells OR Salivary Gland OR Mammary Gland OR BDCA-3+ dendritic cells OR Th1 cells OR Epidermis OR Testis OR Plasmacytoid dendritic cells) AND  
(data sources = BIND OR BIOGRID OR Cognition OR DIP OR Ingenuity Expert Findings OR Ingenuity ExpertAssist Findings OR INTACT OR Interactome studies OR MINT OR MIPS OR TarBase)

## Top Networks

| ID | Associated Network Functions                                                         | Score |
|----|--------------------------------------------------------------------------------------|-------|
| 1  | Cellular Development, Cellular Growth and Proliferation, Tumor Morphology            | 41    |
| 2  | Cell Death, Embryonic Development, Tumor Morphology                                  | 16    |
| 3  | Cancer, Hematological Disease, Cell Cycle                                            | 14    |
| 4  | Connective Tissue Development and Function, Embryonic Development, Organ Development | 12    |

## Top Bio Functions

### Diseases and Disorders

| Name                        | p-value             | # Molecules |
|-----------------------------|---------------------|-------------|
| Cancer                      | 1.38E-12 - 9.49E-03 | 36          |
| Gastrointestinal Disease    | 4.33E-11 - 9.49E-03 | 27          |
| Hematological Disease       | 8.05E-11 - 7.94E-03 | 18          |
| Reproductive System Disease | 2.13E-10 - 9.49E-03 | 26          |
| Respiratory Disease         | 1.72E-09 - 3.17E-03 | 15          |

### Molecular and Cellular Functions

| Name                              | p-value             | # Molecules |
|-----------------------------------|---------------------|-------------|
| Cell Death                        | 5.92E-14 - 9.49E-03 | 25          |
| Gene Expression                   | 1.63E-13 - 9.49E-03 | 27          |
| Cellular Development              | 3.29E-12 - 9.49E-03 | 27          |
| Cellular Growth and Proliferation | 1.06E-11 - 9.49E-03 | 24          |
| Cellular Movement                 | 9.58E-11 - 9.49E-03 | 19          |

### Physiological System Development and Function

| Name                                           | p-value             | # Molecules |
|------------------------------------------------|---------------------|-------------|
| Cardiovascular System Development and Function | 5.68E-08 - 8.93E-03 | 11          |
| Organismal Development                         | 5.68E-08 - 9.49E-03 | 11          |
| Tumor Morphology                               | 8.86E-08 - 9.49E-03 | 15          |
| Embryonic Development                          | 4.79E-06 - 9.49E-03 | 13          |
| Hematological System Development and Function  | 6.96E-06 - 6.76E-03 | 16          |

## Top Canonical Pathways

| Name                                   | p-value  | Ratio         |
|----------------------------------------|----------|---------------|
| p53 Signaling                          | 1.5E-08  | 7/96 (0.073)  |
| Huntington's Disease Signaling         | 2.95E-07 | 8/233 (0.034) |
| Cell Cycle: G1/S Checkpoint Regulation | 1.12E-06 | 5/64 (0.078)  |
| Hereditary Breast Cancer Signaling     | 1.32E-06 | 6/123 (0.049) |
| Cyclins and Cell Cycle Regulation      | 4.22E-06 | 5/87 (0.057)  |

## Top Molecules

This analysis has no expression values.

## Top Upstream Regulators

| Upstream Regulator        | p-value of overlap | Predicted Activation State |
|---------------------------|--------------------|----------------------------|
| phorbol myristate acetate | 3.14E-14           |                            |
| EGF (includes EG:13645)   | 1.83E-13           |                            |
| dexamethasone             | 1.83E-13           |                            |
| TP53 (includes EG:22059)  | 8.04E-12           |                            |
| Akt                       | 3.14E-11           |                            |

## Top My Lists

| Name                           | p-value  | Ratio        |
|--------------------------------|----------|--------------|
| Direct players of IL24         | 1.8E-03  | 2/21 (0.095) |
| Cell Differentiation           | 1.47E-01 | 1/50 (0.02)  |
| BIOMARKERS HNC and mouse HPV16 | 2.71E-01 | 1/100 (0.01) |

## Top My Pathways

| Name                    | p-value  | Ratio         |
|-------------------------|----------|---------------|
| FASN malignancy pathway | 1.76E-04 | 4/143 (0.028) |
| IL24 pic                | 4.66E-04 | 3/54 (0.056)  |
| Networks 13,3 Merged 2  | 2.82E-03 | 2/50 (0.04)   |
| Merged networks         | 2.42E-02 | 2/268 (0.007) |

## Top Tox Lists

| Name                                   | p-value  | Ratio         |
|----------------------------------------|----------|---------------|
| p53 Signaling                          | 1.74E-08 | 7/95 (0.074)  |
| Cell Cycle: G1/S Checkpoint Regulation | 1.21E-06 | 5/60 (0.083)  |
| Renal Necrosis/Cell Death              | 1.81E-06 | 9/368 (0.024) |
| Liver Proliferation                    | 2.32E-05 | 6/184 (0.033) |
| Cardiac Necrosis/Cell Death            | 2.62E-05 | 6/188 (0.032) |

## Top Tox Functions

### Cardiotoxicity

| Name                        | p-value             | # Molecules |
|-----------------------------|---------------------|-------------|
| Cardiac Infarction          | 6.34E-03 - 6.34E-03 | 1           |
| Cardiac Necrosis/Cell Death | 1.75E-02 - 1.75E-02 | 2           |
| Pulmonary Hypertension      | 1.03E-01 - 1.03E-01 | 1           |
| Cardiac Hypertrophy         | 1.55E-01 - 1.55E-01 | 1           |

### Hepatotoxicity

| Name                                 | p-value             | # Molecules |
|--------------------------------------|---------------------|-------------|
| Hepatocellular Carcinoma             | 1.29E-04 - 4.66E-02 | 8           |
| Liver Hyperplasia/Hyperproliferation | 1.29E-04 - 4.66E-02 | 8           |
| Liver Necrosis/Cell Death            | 1.38E-04 - 3.44E-02 | 3           |
| Liver Cirrhosis                      | 1.18E-03 - 2.60E-02 | 4           |
| Liver Degeneration                   | 3.17E-03 - 3.17E-03 | 1           |

### Nephrotoxicity

| Name                      | p-value             | # Molecules |
|---------------------------|---------------------|-------------|
| Renal Necrosis/Cell Death | 1.62E-05 - 1.89E-02 | 9           |
| Glomerular Injury         | 3.17E-03 - 3.17E-03 | 1           |
| Kidney Failure            | 3.17E-03 - 3.17E-03 | 1           |
| Renal Proliferation       | 4.94E-03 - 7.05E-02 | 4           |
| Renal Inflammation        | 4.66E-02 - 4.66E-02 | 1           |
